# Supplementary material for: Iron accelerates Fusobacterium nucleatum–induced CCL8 expression in macrophages and is associated with colorectal cancer progression
Source: PubMed Central journal article supplement (PMC9675438; doi:10.1172/jci.insight.156802), 2022-11-08
Supplement: jciinsight-7-156802-s107.pdf [file jciinsight-7-156802-s107.pdf]

**Supplementary Table S6.** The CRISPR-Cas9 guide RNA targeting guide sequences

| Gene                                      | Guide sequence                                          |
|-------------------------------------------|---------------------------------------------------------|
| human <i>RELA</i> #1                      | 5'-AAGTGCAGAGGGGCGCTCCGC-3'                             |
| human <i>RELA</i> #2                      | 5'-CCCCACGAGCTTGTAGGAA-3'                               |
| human <i>IKK<math>\alpha</math></i> #1    | 5'-TACCAAAAACAGAGAACGA-3'                               |
| human <i>IKK<math>\alpha</math></i> #2    | 5'-ACAGACGTTCCCGAAGCCGC-3'                              |
| human <i>IKK<math>\beta</math></i> #1     | 5'-TCAGCCCCCGGAACCGAGAG-3'                              |
| human <i>IKK<math>\beta</math></i> #2     | 5'-GCCGAAGCTCCAGTAGTCGA-3'                              |
| human <i>IKK<math>\alpha/\beta</math></i> | 5'-TACCAAAAACAGAGAACGA-3'<br>5'-TCAGCCCCCGGAACCGAGAG-3' |
