# Supplementary material for: Iron accelerates Fusobacterium nucleatum–induced CCL8 expression in macrophages and is associated with colorectal cancer progression
Source: PubMed Central journal article supplement (PMC9675438; doi:10.1172/jci.insight.156802), 2022-11-08
Supplement: jciinsight-7-156802-s108.pdf [file jciinsight-7-156802-s108.pdf]

**Supplementary Table S7.** The sequences of the PCR primers

| Gene               | PCR primer (forward)       | PCR primer (reverse)         |
|--------------------|----------------------------|------------------------------|
| human <i>GAPDH</i> | 5'-GCAAATTCATGGCACCGT-3'   | 5'-TCGCCCCACTTGATTTTGG-3'    |
| human <i>CXCL6</i> | 5'-TGTTTACGCGTTACGCTGAG-3' | 5'-GTTCTTCAGGGAGGCTACCA-3'   |
| human <i>CCL8</i>  | 5'-CTTCAAGACCAAACGG-3'     | 5'-GAATCCCTGACCCAT-3'        |
| human <i>CCL15</i> | 5'-CCCAGGCCAGTTCACAAAT-3'  | 5'-GTCAGCAGCAAAGTGAAAGCTG-3' |
