# Supplementary material for: Iron accelerates Fusobacterium nucleatum–induced CCL8 expression in macrophages and is associated with colorectal cancer progression
Source: PubMed Central journal article supplement (PMC9675438; doi:10.1172/jci.insight.156802), 2022-11-08
Supplement: jciinsight-7-156802-s110.pdf [file jciinsight-7-156802-s110.pdf]

**Supplementary Table S9.** The sequences of the PCR primers

| Gene                                   | PCR primer (forward)                 | PCR primer (reverse)                  |
|----------------------------------------|--------------------------------------|---------------------------------------|
| human <i>RELA</i> #1                   | 5'-TGCTGCAGCTGCAGTTTGATGATGA-3'      | 5'-GTTAATGCTTCTGCTTAAGCACCTCCA-3'     |
| human <i>RELA</i> #2                   | 5'-TGATTCAGCTTCCCTCTGGAGAAGAAGGAT-3' | 5'-ACAAAGGCAGTTTACTTGCAGAGCTGAGTC-3'  |
| human <i>IKK<math>\alpha</math></i> #1 | 5'-TTCCCTTGTATGCTGTTGTGTGTTTGAAGG-3' | 5'-ACCAACAGTGTGTAAGTGTCCCTAGCTGATT-3' |
| human <i>IKK<math>\alpha</math></i> #2 | 5'-CCTTGGAACAACCTGTGGAACCTGAGG-3'    | 5'-CACCCCTGACACTCCACATTACAGAGAC-3'    |
| human <i>IKK<math>\beta</math></i> #1  | 5'-TGCTACGTGGCTGTCGATCAGGGTGTACA-3'  | 5'-AGTAATCCCAGCAGAGTGTGCAGCATGCC-3'   |
| human <i>IKK<math>\beta</math></i> #2  | 5'-AGGAGAGAAGTTAAAGCCTAGCGATGGGT-3'  | 5'-TCCTCTCGGAAGAGAAACAACACAGATCTC-3'  |
