# Supplementary material for: Iron accelerates Fusobacterium nucleatum–induced CCL8 expression in macrophages and is associated with colorectal cancer progression
Source: JCI journal article supplement (doi:10.1172/jci.insight.156802), 2022-09-22
Supplement: sd2 [file 2]

**Supplementary Table S1.** Association between preoperative transferrin saturation (TSAT) levels and clinicopathological factors in patients with colorectal cancer (CRC) exhibiting high levels of *F. nucleatum*

| Variable                                | TSAT $\geq$ 30%<br>(n=8) | TSAT < 30%<br>(n=50) | P-value  |
|-----------------------------------------|--------------------------|----------------------|----------|
| Age (mean $\pm$ SD, years)              | 79.3 $\pm$ 11.3          | 71.1 $\pm$ 12.1      | 0.079    |
| Sex male                                | 8 (100%)                 | 21 (42.0%)           | 0.0023 * |
| BMI (mean $\pm$ SD, kg/m <sup>2</sup> ) | 21.4 $\pm$ 3.7           | 22.2 $\pm$ 3.3       | 0.54     |
| Tumor location                          |                          |                      | 0.091    |
| Right-sided                             | 1 (12.5%)                | 22 (44.0%)           |          |
| Left-sided                              | 7 (87.5%)                | 28 (56.0%)           |          |
| Depth of invasion                       |                          |                      | 0.70     |
| pathological T1-3                       | 7 (87.5%)                | 41 (82.0%)           |          |
| pathological T4                         | 1 (12.5%)                | 9 (18.0%)            |          |
| LN metastasis                           |                          |                      | 0.75     |
| Absent                                  | 6 (75.0%)                | 40 (80.0%)           |          |
| Present                                 | 2 (25.0%)                | 10 (20.0%)           |          |
| Pathological type                       |                          |                      | 0.16     |
| Tub, pap                                | 8 (100%)                 | 40 (80.0%)           |          |
| Por, sig, muc                           | 0 (0%)                   | 10 (20.0%)           |          |
| Lymphatic invasion                      |                          |                      | 0.83     |
| Absent                                  | 7 (87.5%)                | 45 (90.0%)           |          |
| Present                                 | 1 (14.3%)                | 5 (10.0%)            |          |
| Vascular invasion                       |                          |                      | 0.33     |
| Absent                                  | 3 (37.5%)                | 28 (56.0%)           |          |
| Present                                 | 5 (62.5%)                | 22 (44.0%)           |          |

TSAT: transferrin saturation, CRC; colorectal cancer, *F. nucleatum*: *Fusobacterium nucleatum*, BMI: Body mass index, SD: standard deviation, LN: lymph node, Tub: tubular adenocarcinoma, Pap: papillary adenocarcinoma, Por: poorly differentiated adenocarcinoma, Sig: signet-ring cell carcinoma, Muc: mucinous adenocarcinoma. \* p<0.05
