# Supplementary material for: Iron accelerates Fusobacterium nucleatum–induced CCL8 expression in macrophages and is associated with colorectal cancer progression
Source: JCI journal article supplement (doi:10.1172/jci.insight.156802), 2022-09-22
Supplement: sd3 [file 3]

**Supplementary Table S2.** Association between preoperative transferrin saturation (TSAT) levels and clinicopathological factors in patients with colorectal cancer (CRC) exhibiting low and negative levels of *F. nucleatum*

| Variable                                | TSAT $\geq$ 30%<br>(n=30) | TSAT < 30%<br>(n=116) | P-value |
|-----------------------------------------|---------------------------|-----------------------|---------|
| Age (mean $\pm$ SD, years)              | 69.0 $\pm$ 11.4           | 68.4 $\pm$ 11.9       | 0.80    |
| Sex male                                | 19 (63.3%)                | 66 (56.9%)            | 0.52    |
| BMI (mean $\pm$ SD, kg/m <sup>2</sup> ) | 23.1 $\pm$ 3.7            | 22.7 $\pm$ 4.4        | 0.66    |
| Tumor location                          |                           |                       | 0.47    |
| Right-sided                             | 10 (33.3%)                | 31 (26.7%)            |         |
| Left-sided                              | 20 (66.7%)                | 85 (73.3%)            |         |
| Depth of invasion                       |                           |                       | 0.11    |
| pathological T1-3                       | 28 (93.3%)                | 94 (81.0%)            |         |
| pathological T4                         | 2 (6.7%)                  | 22 (19.0%)            |         |
| LN metastasis                           |                           |                       | 0.21    |
| Absent                                  | 23 (76.7%)                | 75 (64.7%)            |         |
| Present                                 | 7 (23.3%)                 | 41 (35.3%)            |         |
| Pathological type                       |                           |                       | 0.040 * |
| Tub, pap                                | 23 (76.7%)                | 105 (90.5%)           |         |
| Por, sig, muc                           | 7 (23.3%)                 | 11 (9.5%)             |         |
| Lymphatic invasion                      |                           |                       | 0.52    |
| Absent                                  | 23 (76.7%)                | 82 (70.7%)            |         |
| Present                                 | 7 (23.3%)                 | 34 (29.3%)            |         |
| Vascular invasion                       |                           |                       | 0.46    |
| Absent                                  | 17 (56.7%)                | 57 (49.1%)            |         |
| Present                                 | 13 (43.3%)                | 59 (50.9%)            |         |

TSAT: transferrin saturation, CRC; colorectal cancer, *F. nucleatum*: *Fusobacterium nucleatum*, BMI: Body mass index, SD: standard deviation, LN: lymph node, Tub: tubular adenocarcinoma, Pap: papillary adenocarcinoma, Por: poorly differentiated adenocarcinoma, Sig: signet-ring cell carcinoma, Muc: mucinous adenocarcinoma. \* p<0.05
